# Supplementary material for: Growth mechanism and electrochemical properties of hierarchical hollow SnO2 microspheres with a “chestnut” morphology
Source: Royal Society of Chemistry journal article supplement (doi:10.1039/c7ce01288h), 2017-01-01
Supplement: c7ce01288h1.pdf [file c7ce01288h1.pdf]

## Electronic Supplementary Information

### “Growth mechanism and electrochemical properties of hierarchical hollow SnO<sub>2</sub> microspheres with “chest-nut” morphology”

Huating Hu<sup>a</sup>, Liming Wu<sup>b,c</sup>, Paul Gebhardt<sup>a,e</sup>, Xiaofei Zhang<sup>a</sup>, Alexey Cherevan<sup>a,e</sup>, Birgit Gerke<sup>f</sup>, Rainer Pöttgen<sup>f</sup>, Andrea Balducci<sup>a,b,c,d</sup>, Stefano Passerini<sup>b,c</sup>, Dominik Eder<sup>a,e,\*</sup>

<sup>a</sup> Institute of Physical Chemistry, University of Münster, Corrensstraße 28/30, 48149 Münster, Germany

<sup>b</sup> Helmholtz Institute Ulm, Helmholtzstraße 11, 89081 Ulm, Germany

<sup>c</sup> Karlsruher Institute of Technology (KIT), PO Box 3640, 76021 Karlsruhe, Germany

<sup>d</sup> Institute for Technical Chemistry and Environmental Chemistry Center for Energy and Environmental Chemistry Jena (CEEC Jena) Philosophenweg 7A , 07743 Jena, Germany

<sup>e</sup> Institut für Materialchemie, Technische Universität Wien, Getreidemarkt 9, 1060 Wien, Austria

<sup>f</sup> Institut für Anorganische und Analytische Chemie, Universität Münster, Corrensstrasse 30, D-48149 Münster, Germany

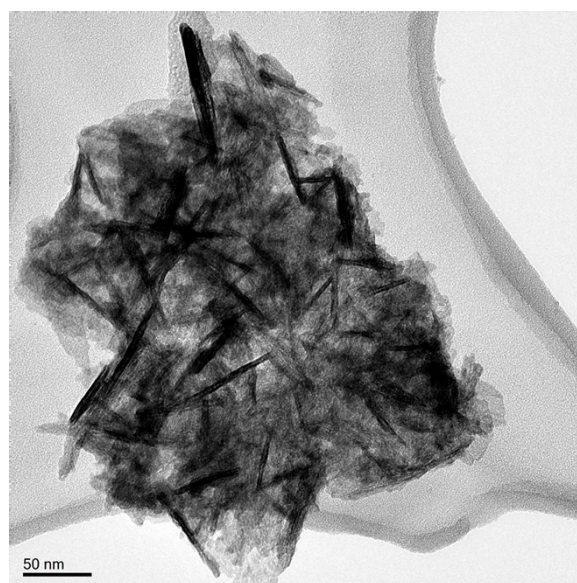

Fig.S1: A typical TEM image of SnO<sub>2</sub> prepared by conventional hydrothermal

---

\*Corresponding author. Tel.: +49 251 83-23406. Email: dominik.eder@tuwien.ac.at

method without sonication pretreatment of  $\text{SnCl}_2$  in DI water

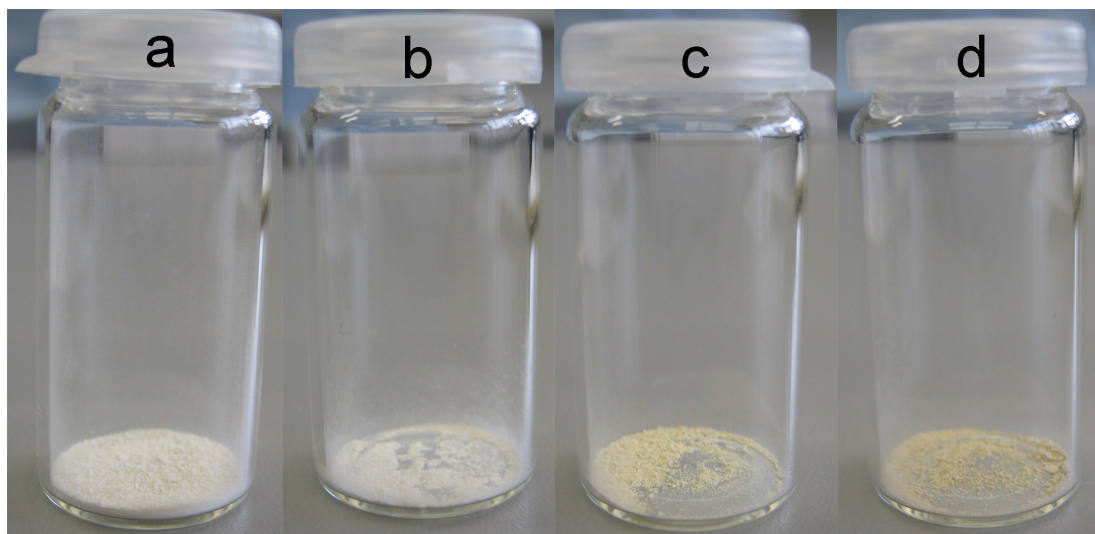

Fig. S2. Digital Photos of Products with different color collected after different hydrothermal reaction time during the preparation process of  $\text{SnO}_2$  HHMSs: (a) 0 h; (a) 0.5 h; (a) 2 h; (a) 6 h.

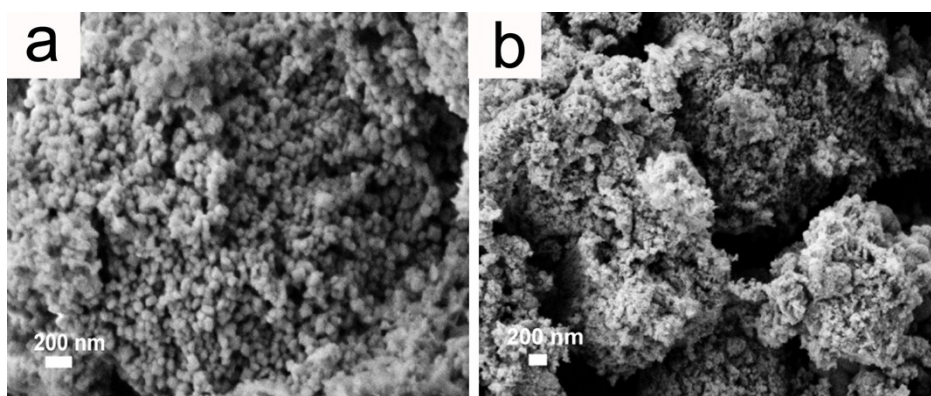

Fig. S3 SEM images of  $\text{SnO}_2$  prepared at higher temperature: (a) 180 °C; (b) 210 °C respectively. The other experimental conditions are the same as that of  $\text{SnO}_2$  HHMSs. Interesting it's found that at higher reaction temperature (i.e., 180 or 210 °C) only  $\text{SnO}_2$  nanoparticles (NPs) or NPs aggregations rather than HHMSs could be obtained.

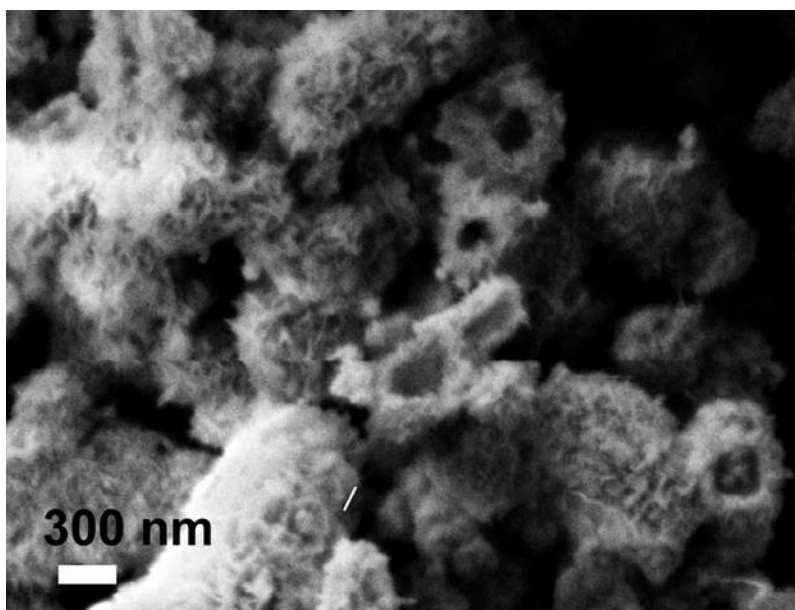

**Fig. S4** SEM image of final products obtained by sonication assistant method with  $\text{SnCl}_2$  concentration of 0.11 g/mol

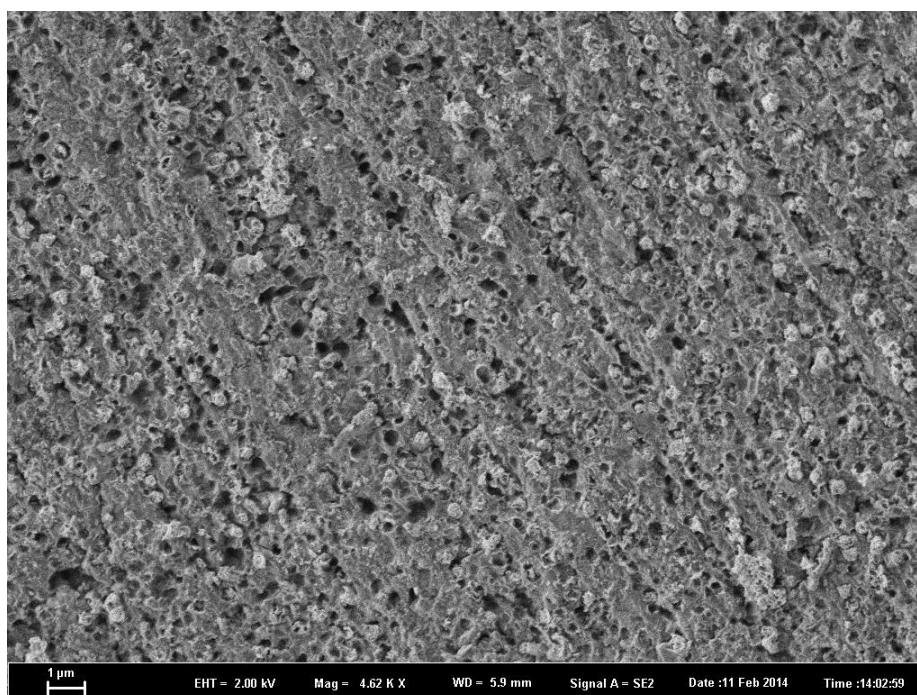

**Fig. S5** SEM image of  $\text{SnO}_2$  HHMSs based anode taken from LIBs after 50th cycling.
